# Supplementary material for: Facile and scalable bilayer polymer encapsulation to achieve long-term stability of perovskite solar cells under harsh humidity conditions
Source: Royal Society of Chemistry journal article supplement (doi:10.1039/d3se01483e), 2024-01-01
Supplement: d3se01483e1.pdf [file d3se01483e1.pdf]

## **Supporting Information**

# **Facile and Scalable Bilayer Polymer Encapsulation to Achieve Long-term Stability of Perovskite Solar Cells Under Harsh Humid Conditions**

*Rohith Kumar Raman<sup>1</sup>, Saraswathi Ganesan<sup>2</sup>, Ananthan Alagumala<sup>2</sup>, Vidya Sudhakaran Menon<sup>2</sup>, Suresh Krishnan<sup>3</sup>, Senthil A. Gurusamy Thangavelu<sup>2</sup>, , Ananthanarayanan Krishnamoorthy<sup>2\*</sup>*

<sup>1</sup>Department of Physics and Nanotechnology, SRM Institute of Science and Technology, Kattankulathur, Tamil Nadu, India, Pin Code-603203.

<sup>2</sup>Organic and Perovskite Photovoltaics Laboratory (OPPV), Department of Chemistry, SRM Institute of Science and Technology, Kattankulathur, Tamil Nadu, India, Pin Code-603203.

<sup>3</sup>Department of Chemical Engineering, SRM Institute of Science and Technology, Kattankulathur, Tamil Nadu, India, Pin Code-603203.

E-mail: [ananthak@srmist.edu.in](mailto:ananthak@srmist.edu.in)

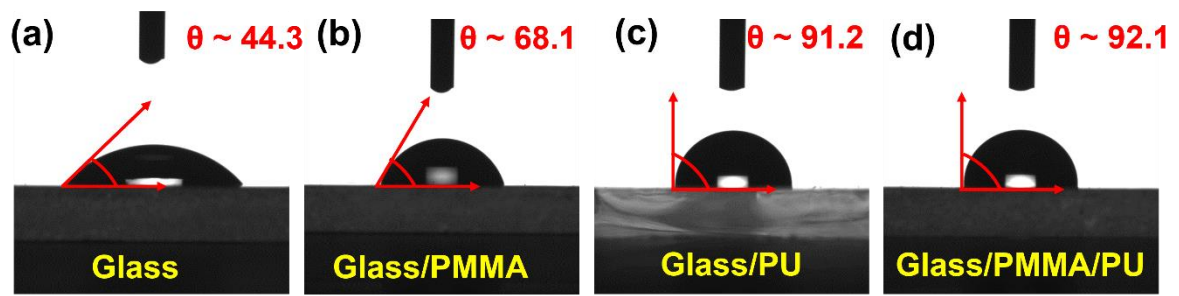

**Fig. S1** (a) – (d) Water contact angle images of polymers coated on glass.

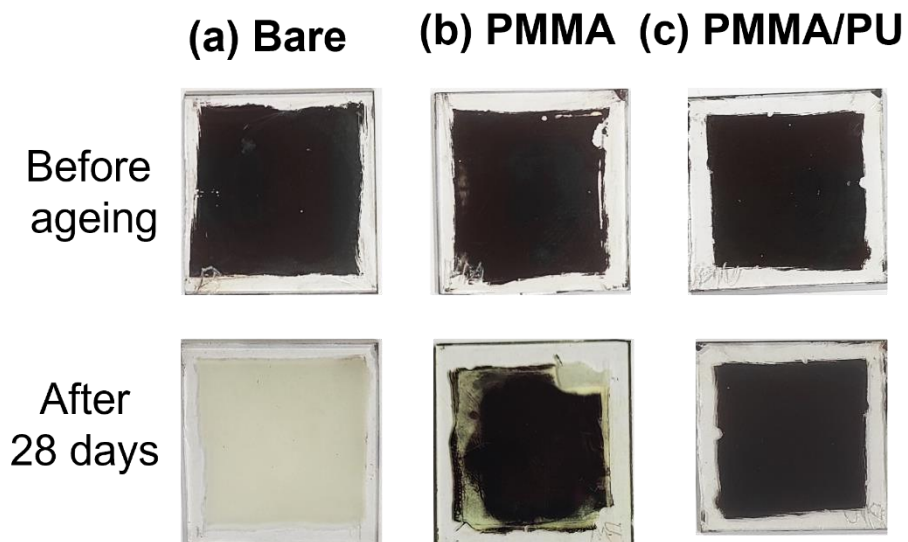

**Fig. S2** (a) – (c) Photographs of bare and encapsulated absorbers kept at humid conditions ( $80 \pm 5$  % RH,  $25 \pm 3$  °C).

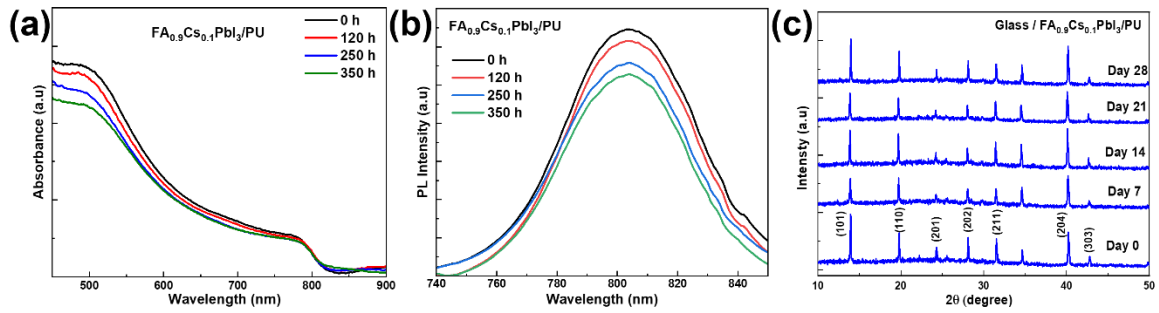

**Fig. S3** (a) Absorbance plot of PU encapsulated  $\text{FA}_{0.9}\text{Cs}_{0.1}\text{PbI}_3$  absorber films, (b) PL emission spectra of PU encapsulated  $\text{FA}_{0.9}\text{Cs}_{0.1}\text{PbI}_3$  absorber films, (c) Diffraction patterns of PU encapsulated  $\text{FA}_{0.9}\text{Cs}_{0.1}\text{PbI}_3$  absorber films kept at  $25 \pm 3^\circ\text{C}$  and  $80 \pm 5\% \text{RH}$ .

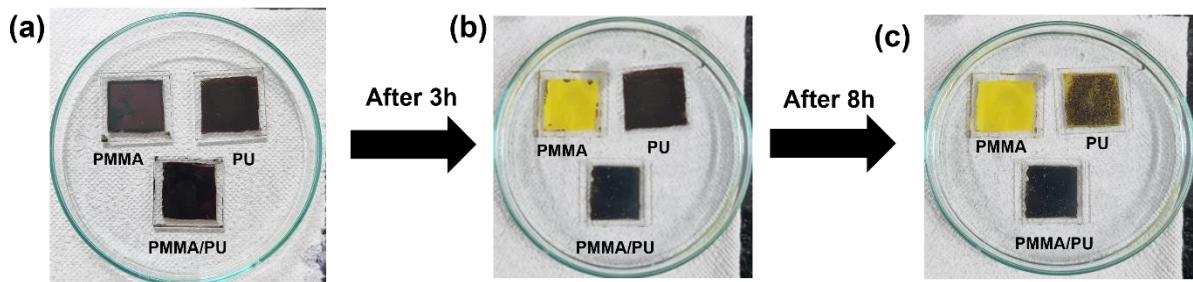

**Fig. S4** Digital photographs of encapsulated absorbers dipped in water (a) photographs at 0 h, (b) photographs at 3h and (c) photographs at 8h (PU encapsulated absorber started to degrade to  $\text{PbI}_2$  after dipping in water).

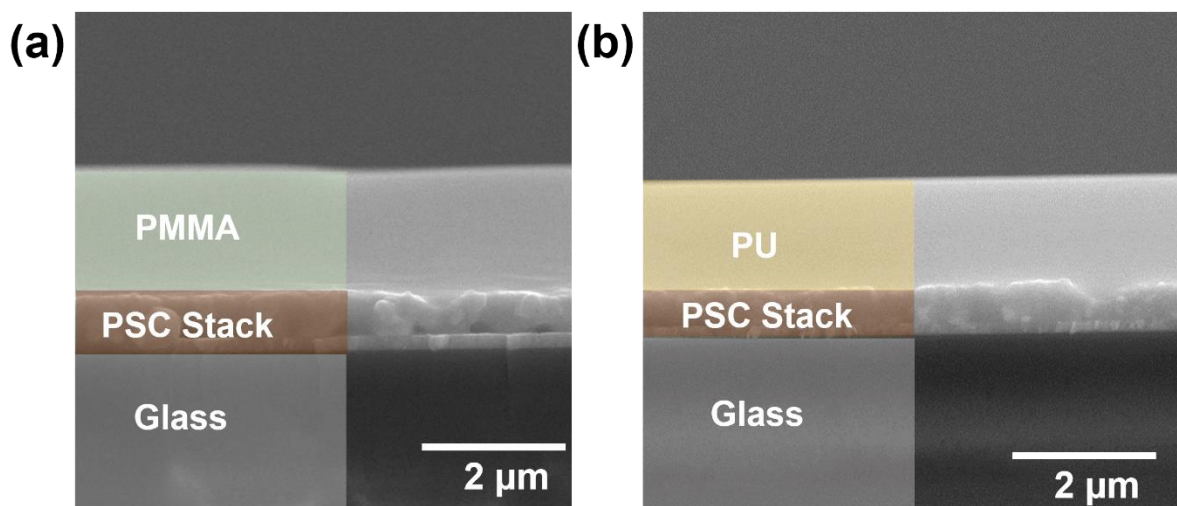

**Fig. S5** a) Cross-sectional SEM image of PMMA encapsulated PSC and (b) Cross-sectional SEM image of PU encapsulated PSC.

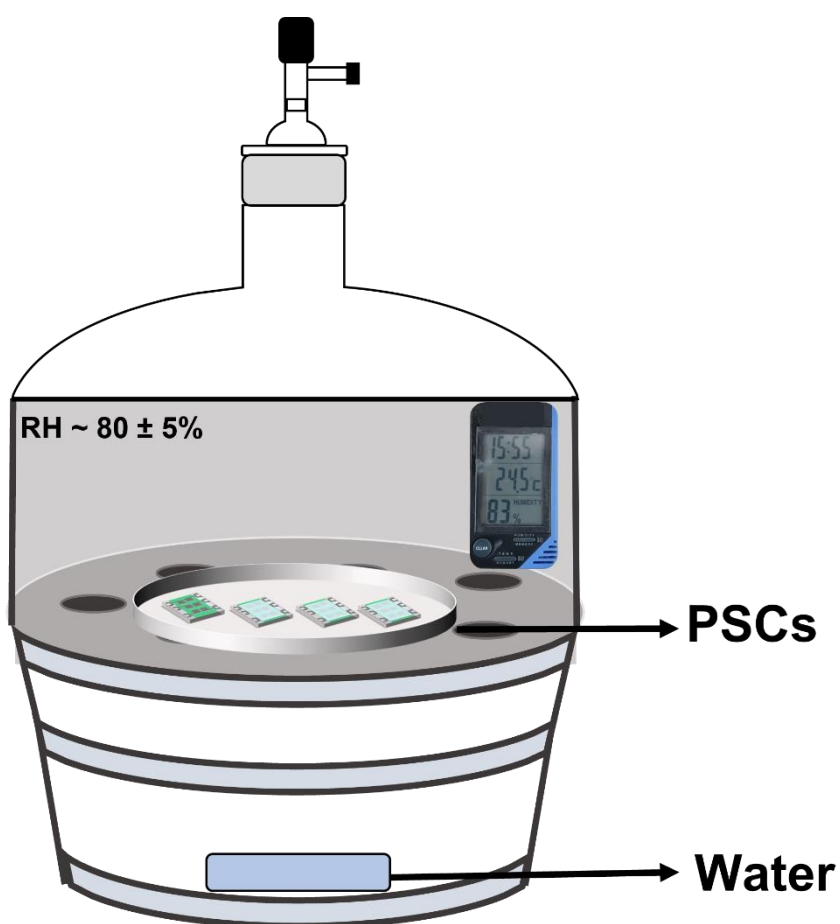

**Fig. S6** Schematic representation of PSCs kept in a desiccator with water to achieve humid condition ( $80 \pm 5\%$  RH).
